# Supplementary material for: PSS-dispersed dopamine triggered formation of PAA adhesive hydrogel as flexible wearable sensors
Source: Royal Society of Chemistry journal article supplement (doi:10.1039/d2ra07243b), 2023-01-01
Supplement: d2ra07243b1.pdf [file d2ra07243b1.pdf]

Electronic Supplementary Information (ESI) for RSC Advances

This journal is © The Royal Society of Chemistry 2022

## **Supporting Information**

### **PSS-dispersed dopamine triggered formation of PAA**

#### **adhesive hydrogel as flexible wearable sensors**

Xinyu He<sup>a,b</sup>, Nuan Wen<sup>a,b</sup>, Wei Zhang<sup>a,b</sup>, Shuai He<sup>a,b</sup>, Shuang Yang<sup>a,b</sup>, Xinhua Li<sup>a,b</sup>, Chaoxi Chen<sup>c\*</sup> and Fang Zuo<sup>a,b\*</sup>

a. College of Chemistry & Environment, Southwest Minzu University, Chengdu 610041, China.

b. Key Laboratory of Pollution Control Chemistry and Environmental Functional Materials for Qinghai-Tibet Plateau of the National Ethnic Affairs Commission, Southwest Minzu University, Chengdu 610041, China.

c. College of Animal Science & Veterinary Medicine, Southwest Minzu University, Chengdu 610041, China.

#### **This File Includes:**

Supplementary Figures S1 to S7

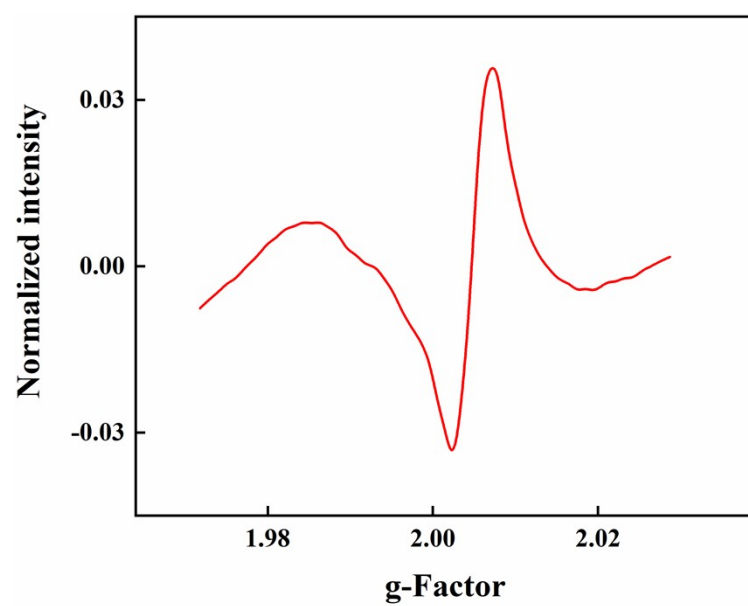

**Figure S1** The ESR signals of DA:PSS.

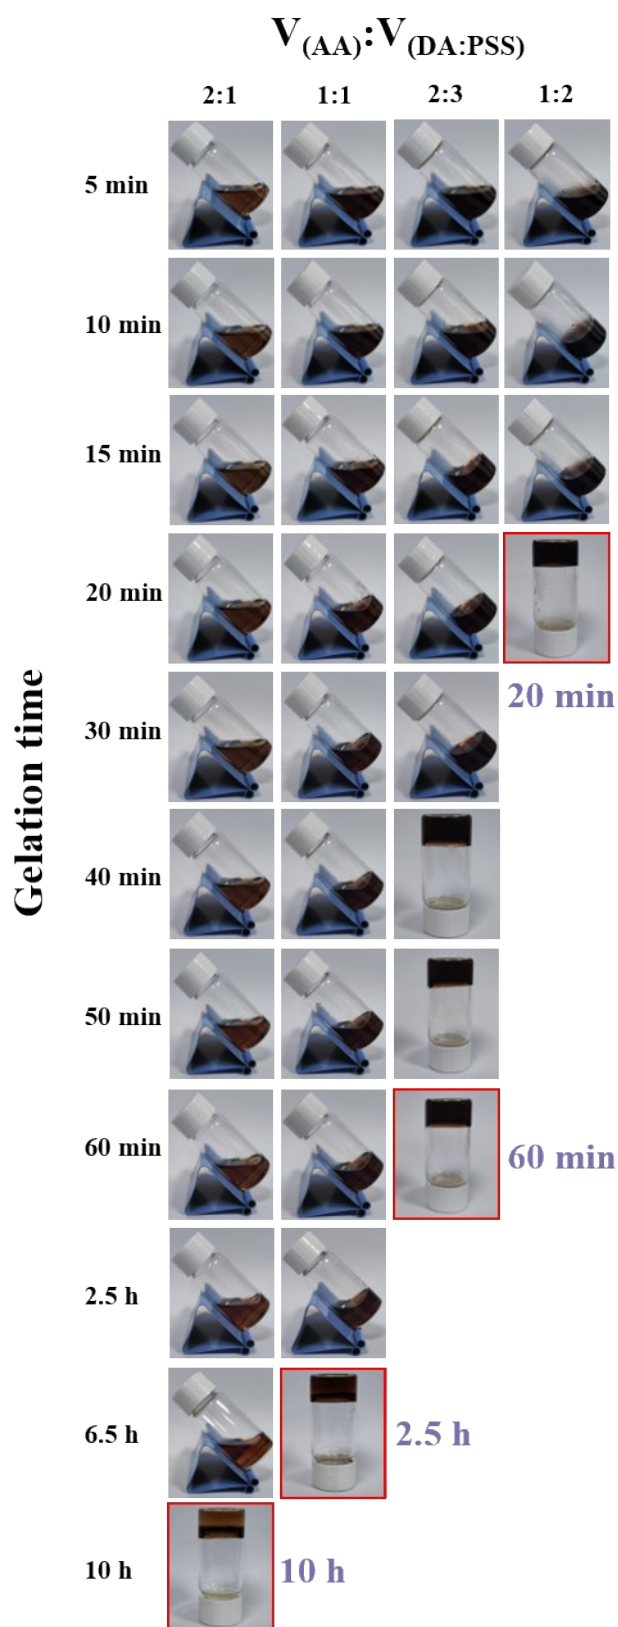

**Figure S2** The digital photograph of the gelation process of the mixed solution of AA and DA:PSS. ( $V_{(AA)}:V_{(DA:PSS)}$  is the volume of AA to the volume of DA:PSS solution, where the concentration of DA and PSS in DA:PSS solution is 0.200 g/mL and 0.400 g/mL, respectively.)

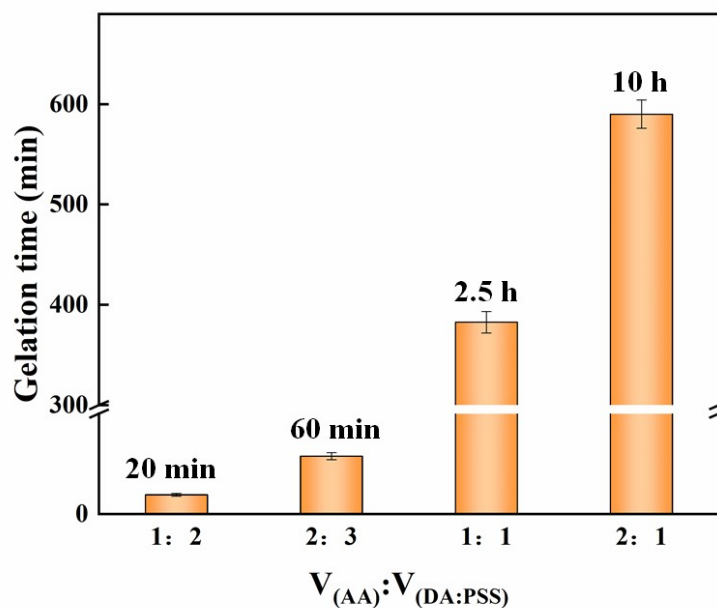

**Figure S3** The gelation time of the mixed solution of AA and DA:PSS. ( $V_{(AA)}:V_{(DA:PSS)}$  is the volume of AA to the volume of DA:PSS solution, where the concentration of DA and PSS in DA:PSS solution is 0.200 g/mL and 0.400 g/mL ,respectively.)

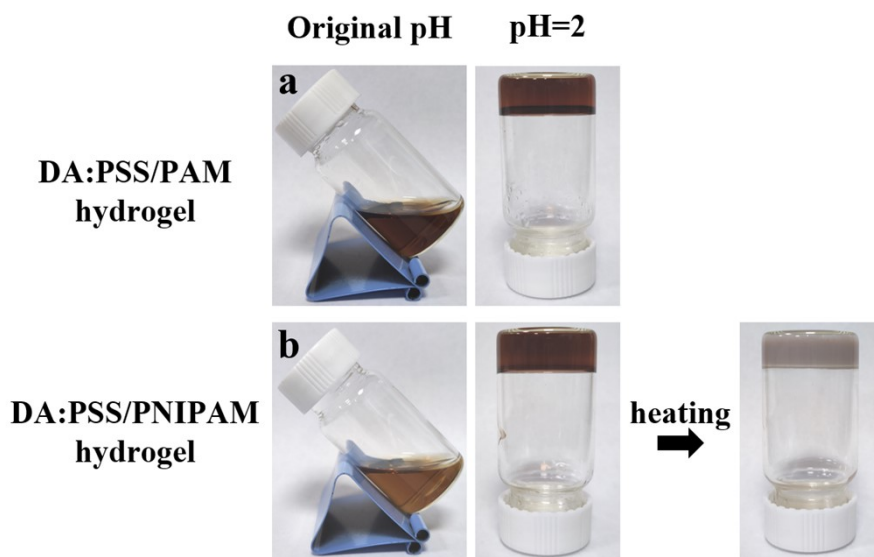

**Figure S4** The universality of DA:PSS-initiated strategy for the preparation of hydrogels. (a) DA:PSS/PAM hydrogel polymerized under acidic conditions. (b) DA:PSS/PNIPAM hydrogel polymerized under acidic conditions.

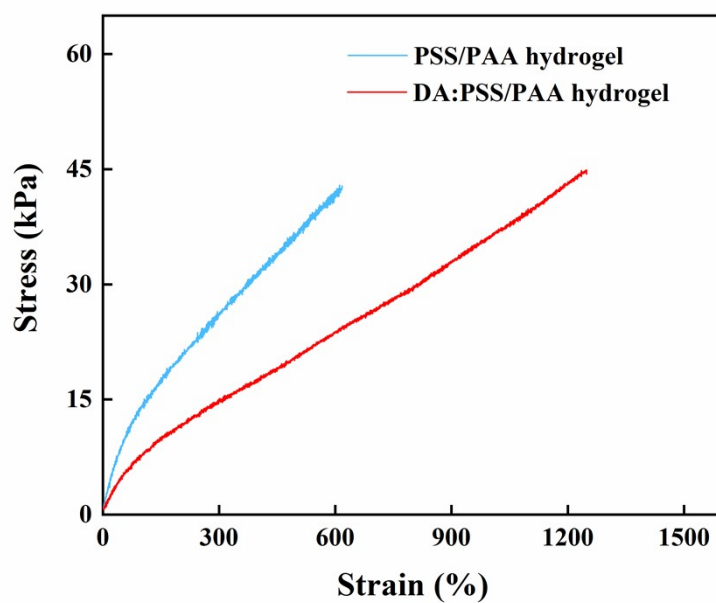

**Figure S5** The comparison of the properties of the PSS/PAA hydrogel (using APS as the initiator) and of the DA:PSS/PAA hydrogel.

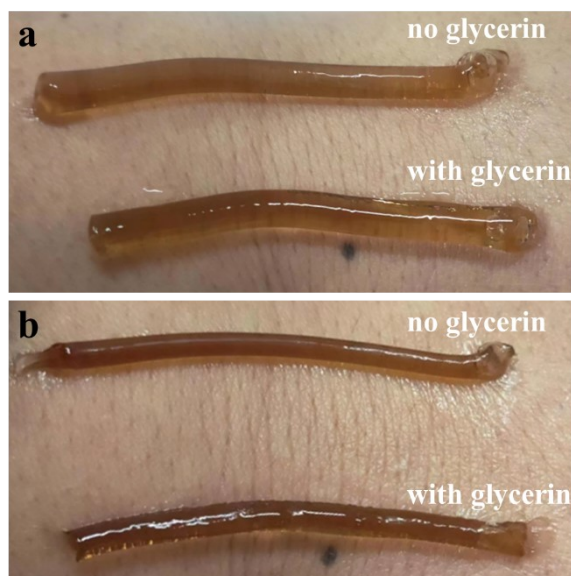

**Figure S6** The digital photograph of the DA:PSS/PAA hydrogel attached to the skin with/without coated with glycerin:(a) initial state. (b) attached for 5 h.

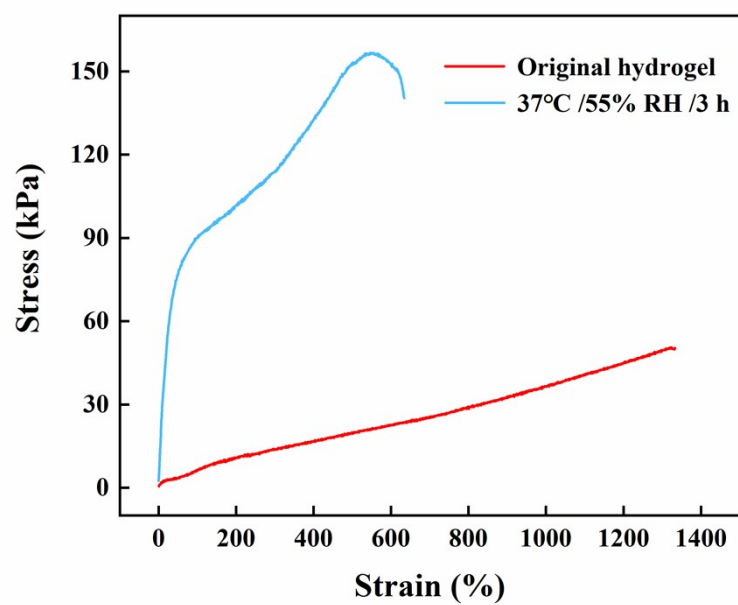

Figure S7 Mechanical properties of DA: PSS/PAA hydrogel before and after placed at 37 °C and 55% RH for 3 h.
